# Supplementary material for: Nontarget Metabolites of Rhizomes of Edible Sacred Lotus Provide New Insights into Rhizome Browning
Source: Hindawi journal article supplement (doi:10.1155/2022/3943052), 2022-10-26
Supplement: f1 [file 3943052.f1.docx]

Table S1

| Lotus cultivars used in this manuscript. | |
| --- | --- |
| Type | Name（No.） |
| Flower-lotus cultivars  (161) | 3735(A001)、AJN(A003)、AYL(A004)、BG(A005)、BHL(A006)、BJZL(A009)、BLXZ(A010)、BSYL(A011)、BXGZ(A012)、BLFR(A013)、BLWZ(A014)、BSH(A015)、BZGY(A016)、CEBY(A020)、CJB(A021)、CXBL(A022)、CXFL(A023)、CBL(A025)、CHQY(A026)、CYB(A028)、CYH(A030)、DSJ(A033)、DS(A034)、DZY(A035)、DZHL(A036)、DFH1(A037)、DFH2(A038)、DGL189(A040)、ECHL(A041)、FHO(A046)、FHU(A047)、FHLX(A049)、FX13(A050)、FHL(A052)、FSL(A054)、GD(A056)、GYL(A057)、GQH(A058)、HDL(A060)、HDL13(A061)、HH(A062)、HBYD(A064)、HQY(A066)、HS(A067)、HTL(A068)、HWL(A069)、HXYR(A070)、HMD(A072)、HWL(A073)、HWM(A074)、HWF(A075)、HY(A076)、HJ(A077)、JRSF(A078)、JXZS(A080)、JLNC(A087)、JLD(A088)、JPG(A089)、JSH(A091)、JTY(A092)、JWB(A093)、JWYC(A094)、JZLYP(A095)、JB(A097)、JL(A098)、JWB(A099)、KLLHH(A100)、LBXZ(A101)、LRY1(A102)、LRY2(A103)、MKBL(A104)、MNH(A105)、MTX(A106)、MZH(A109)、MLQS(A110)、MLL(A111)、NHLL(A112)、QBL(A115)、QHFC(A117)、QLHL(A119)、QC(A120)、QSCT(B123)、QZJ(A126)、RYGY(A127)、RX(A128)、SJ(A129)、SCDH(A130)、SL(A133)、SXT(A134)、SN(A135)、SL13(A136)、SF(A138)、TKFT (A140)、TZTSL(A141)、THSY(A142)、TH(A144)、TL(A145)、WZQH(A146)、WSHL(A147)、WXJ(A148)、WFL(A153)、WN(A154)、XHHL(A155)、XHY(A156)、XB(A157)、XSD(A158)、XBH(A159)、XJB(A161)、XJL13A(A162)、XLZ13(A163)、XMJH(A164)、XSJ(A165)、XZZ(A166)、XZX(A167)、XX(A168)、XXMWL(A169)、XFQ(A171)、XL(A172)、XJ(A173)、XZFC(A174)、YYT(A175)、YCCN(A176)、YCBL(A179)、YJYZ(A181)、YTJM(A184)、YW13(A185)、YJ(A186)、ZGGDL(A188)、ZGHBJ(A189)、ZSCT(A190)、ZBFHL(A191)、ZYSZ(A192)、ZF(A193)、ZY(A194)、ZY13(A195)、ZY(A197)、ZYT(A198)、ZY(A199)、ATC(B005)、ATC13(B006)、BJ(B007)、BJZXL(B008)、BLN(B010)、GXL(B011)、GH(B012)、RYH(B016)、SMG(B017)、XYW(B023)、YWTY(B024)、TKJY(B061)、BJ(B032)、CFHY(B033)、JY(B042)、LH(B043)、PZH(B044)、QYSH(B045)、SH(B046)、YFHX(B057)、CB17(B058)、ZFCY(B059)、LFHZ(B060) |
| Rhizome-lotus cultivars  (21) | BJBHO(A017)、CB(A027)、DFT(A031)、DQK(A032)、DHZO(A039)、EL1(A042)、EL5(A043)、EL6(A044)、EL8(A045)、FHO(A053)、HZBHO(A059)、JSWHO(A082)、JHBL(A086)、MJ(A107)、SZO(A137)、WZSDO(A149)、YO(A178)、YNLLO(A187)、37(B031)、JNWM(B037)、SLH (B047) |
| Seed-lotus cultivars  (18) | BHJL2 (A008)、FJHQ(A051)、HHJL(A063)、HXL(A071)、JFR(A083)、JFR1(A084)、JFR2(A085)、TK58 (A139)、WK7(A151)、WZ2(A152)、XL(A160)、HHJH(A200)、GCCTBL(B034)、JX21(B038)、TXL(B050)、XFR2(B051)、XL(B053)、XL5(B054) |
| Thai-lotus cultivars  (8) | Ti-12(B001)、Ti-13(B002)、TG13(B018)、TG41(B019)、TG42(B020)、TG45(B021)、TGBCL(B022)、TGHQL(B027) |
| Wild-lotus cultivars(3) | PZHBH(A114)、QLBH(A116)、YHL(A177) |
| Nelumbo lutea (1) | MHL(A108) |
